# Supplementary material
Source: Springer Nature journal article supplement (https://www.springermedizin.de/resource/supplementary/12906_2001_9_MOESM3_ESM.pdf/9519328)

- ◆ CoCl<sub>2</sub>-Cad Sulph - 30
- CoCl<sub>2</sub>-Alc - 30
- ▲ CoCl<sub>2</sub>-Cad Sulph - 200
- ⊞ CoCl<sub>2</sub>-Alc - 200

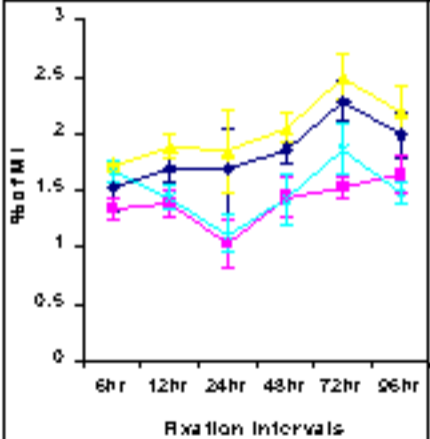

Supplement: MOESM3 [file 9519328]
